# Supplementary material
Source: PubMed Central journal article supplement (PMC4627493)
Supplement: NIHMS729773-supplement-Supplemental_figures.pdf [file NIHMS729773-supplement-Supplemental_figures.pdf]

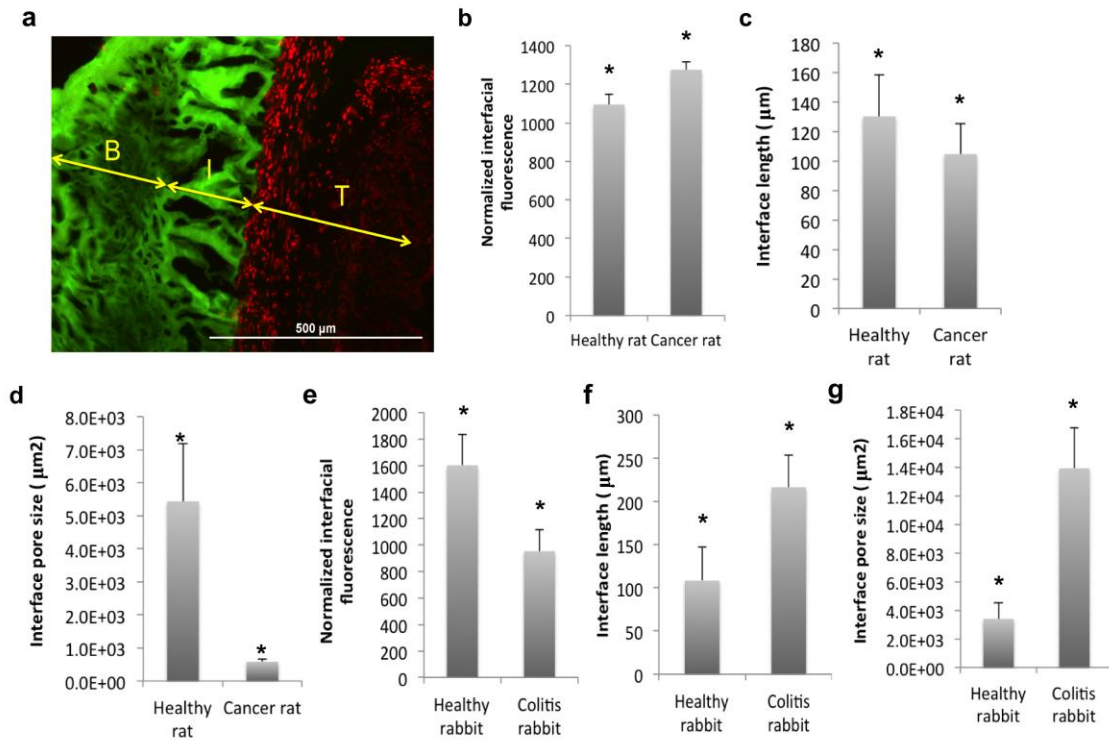

**Supplemental Figure 1. Dendrimer:dextran Interfacial Morphology Characterization in Inflammation and Neoplasia.** (a) Morphology of the interfacial region between fluorescein tagged adhesive material (green) (B – bulk, and I – interface) and excised rabbit colon tissue (T), stained with propidium iodide (red). (b) Interfacial fluorescence when material was applied to healthy and cancerous rat colon was quantified as a surrogate for material adhesion/interaction with the tissue. Interfacial (c) length and (d) pore size was measured in healthy and cancerous states in rat colon ( $p < 0.05$ ). Interfacial (e) fluorescence, (f) length and (g) pore size were also measured in healthy and colitic rabbit colon ( $p < 0.05$ ).

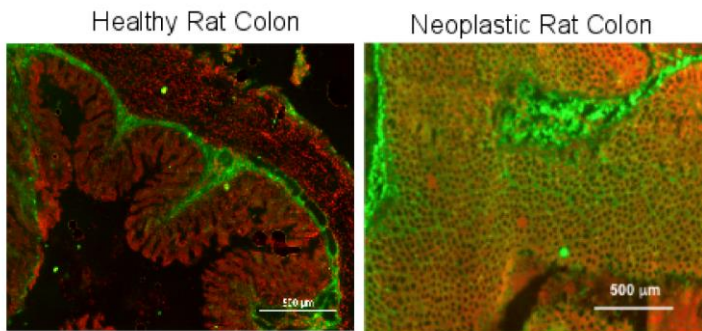

**Supplemental Figure 2. Collagen I Immunostaining in Healthy and Neoplastic Tissues.**

Basement membrane collagen I (COL-I) immunostaining (green, FITC-conjugated secondary antibody) in healthy and neoplastic rat colon (red, stained with propidium iodide).

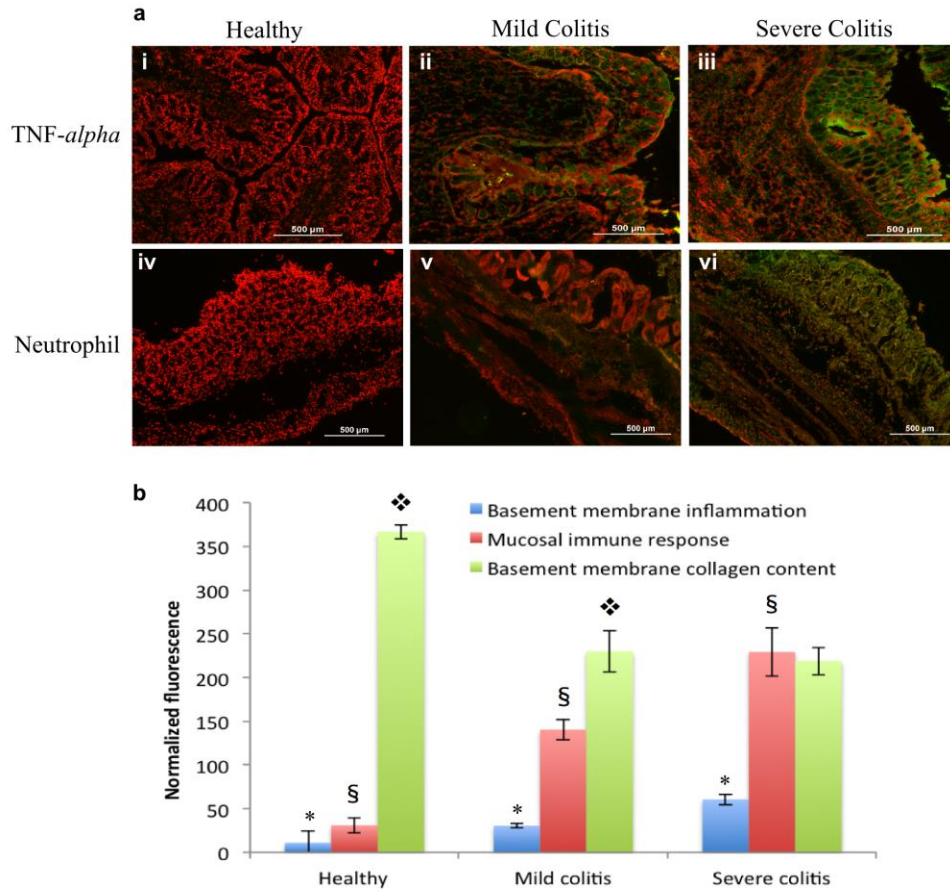

**Supplemental Figure 3. Study of Alterations in Tissue Biological and Chemical Cues as a Function of Disease Severity.** (a) Immunofluorescence staining against mucosal TNF- $\alpha$  (i-iii) and basement membrane neutrophils (iv-vi) were performed in rabbit healthy, mild and severe colitis tissues. (b) Normalized fluorescence from mucosal TNF- $\alpha$ , neutrophils and basement membrane collagen in the tissue sections was quantified ( $p < 0.05$ ).

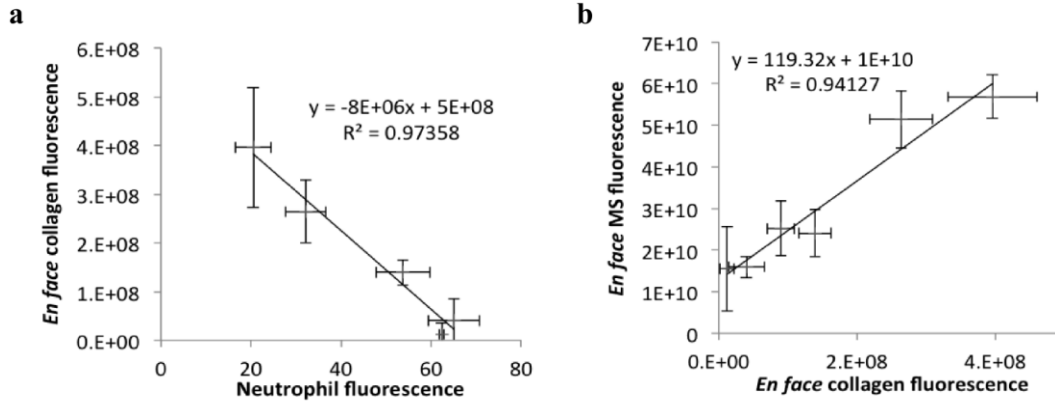

**Supplemental Figure 4. *En face* Collagen I Correlations with Neutrophil Recruitment and Microspheres Conjugation.** *En face* collagen content (b), measured by immunofluorescence staining, correlates with neutrophil recruitment to the colorectal wall, as measured by fluorescence immunostaining on tissue sections. Collagen content *en face* (c) also correlates linearly with the serosal amine content, as measured by aldehyde-coated fluorescent microspheres *en face*.

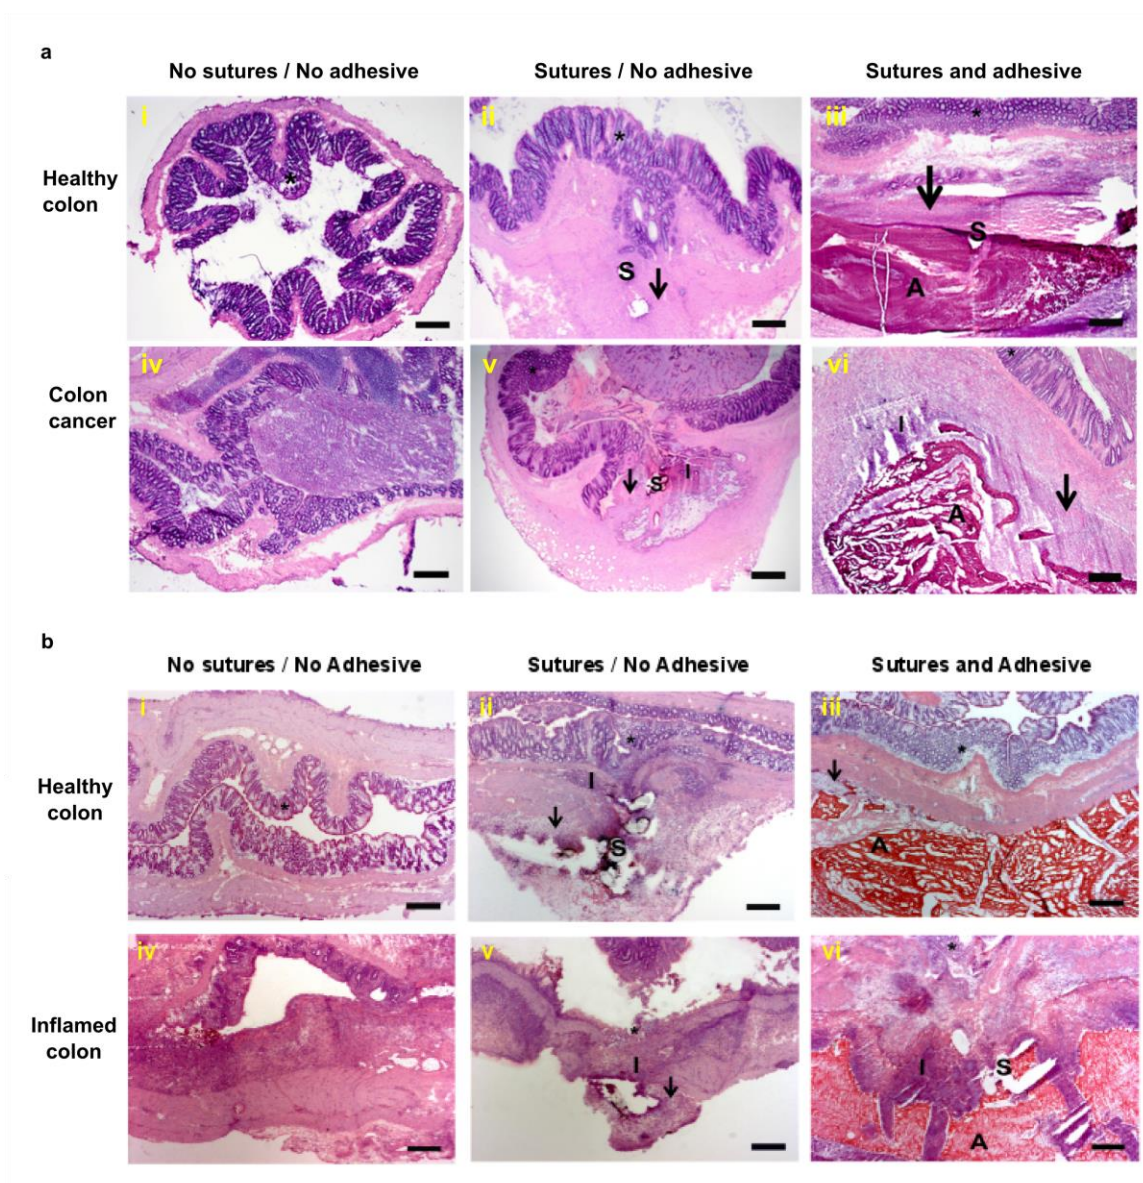

**Supplemental Figure 5. *In vivo* Hematoxylin and Eosin Staining Images.** (a) Hematoxylin and eosin (H&E) staining of rat healthy and cancerous tissues without treatment (i and iv), sutural closing of anastomoses site (ii and v) and combination of sutures and adhesive (iii and vi). (b) Hematoxylin and eosin (H&E) staining of rabbit healthy and colitic tissues without treatment (i and iv), sutural closing of anastomoses site (ii and v) and combination of sutures and adhesive (iii and vi).

| <b>Mechanical testing G20%&amp;D25%</b> |                   |                       |                       |
|-----------------------------------------|-------------------|-----------------------|-----------------------|
| <b>Healthy Rat</b>                      | <b>Cancer Rat</b> | <b>Healthy rabbit</b> | <b>Colitic rabbit</b> |
| 0.82                                    | 0.5               | 1.08                  | 0.29                  |
| 0.79                                    | 0.7               | 0.83                  | 0.43                  |
| 0.85                                    | 0.56              | 0.72                  | 0.56                  |
| 0.74                                    | 0.54              | 0.71                  | 0.34                  |
| 0.84                                    | 0.53              | 0.72                  | 0.17                  |

**Supplemental Table 1. Tabulated data from Figures 1c and 1d.**

| <b>Mechanical testing G20% and varying dextran aldehyde compositions</b> |               |               |               |
|--------------------------------------------------------------------------|---------------|---------------|---------------|
| <b>7.50%</b>                                                             | <b>10.00%</b> | <b>15.00%</b> | <b>25.00%</b> |
| 0.28                                                                     | 0.34          | 0.6           | 1.08          |
| 0.21                                                                     | 0.37          | 0.69          | 0.83          |
| 0.24                                                                     | 0.33          | 0.51          | 0.72          |
| 0.29                                                                     | 0.3           | 0.7           | 0.71          |
| 0.22                                                                     | 0.29          | 0.48          | 0.72          |

**Supplemental Table 2. Tabulated data from Figure 1e.**

| <b>Mechanical testing G20% on healthy and colitic tissues</b> |                    |
|---------------------------------------------------------------|--------------------|
| <b>Healthy 10%</b>                                            | <b>Colitic 25%</b> |
| 0.34                                                          | 0.29               |
| 0.37                                                          | 0.43               |
| 0.33                                                          | 0.56               |
| 0.3                                                           | 0.34               |
| 0.29                                                          | 0.17               |

**Supplemental Table 3. Tabulated data from Figure 1f.**

| <b>Cancer microenvironment characterization</b> |                   |                    |                   |
|-------------------------------------------------|-------------------|--------------------|-------------------|
| <b>MS</b>                                       |                   | <b>COL-I</b>       |                   |
| <b>Healthy Rat</b>                              | <b>Cancer Rat</b> | <b>Healthy Rat</b> | <b>Cancer Rat</b> |
| 23.73796                                        | 47.89796          | 20.2886            | 35.4532           |
| 36.77796                                        | 55.58796          | 6.02192            | 28.0112           |
| 21.16796                                        |                   | 16.531             | 37.4784           |

**Supplemental Table 4. Tabulated data from Figure 2a.**

| <b>Colitis microenvironment characterization</b> |                       |                       |                       |
|--------------------------------------------------|-----------------------|-----------------------|-----------------------|
| <b>MS</b>                                        |                       | <b>COL-I</b>          |                       |
| <b>Healthy Rabbit</b>                            | <b>Colitis Rabbit</b> | <b>Healthy Rabbit</b> | <b>Colitis Rabbit</b> |
| 49.8375                                          | 12.42115              | 32.215                | 8.57                  |
| 57.9875                                          | 15.90115              | 27.705                | 2.676                 |
| 38.4875                                          | 19.25115              | 32.245                | 3.275                 |
| 48.5275                                          | 17.31115              | 41.175                | 2.155                 |
| 86.1875                                          | 14.72115              | 31.685                | 3.327                 |
| 55.40208                                         | 20.32115              | 43.659                | 1.619                 |
| 54.45208                                         | 24.39115              | 47.449                | 1.289                 |
| 60.75208                                         | 19.97115              | 33.009                | 0.111                 |
| 50.13208                                         | 21.96115              | 32.959                | 2.746                 |
| 63.27208                                         | 18.52115              | 40.839                | 0.441                 |

**Supplemental Table 5. Tabulated data from Figure 2b.**

| Healthy rat in vivo data |          |             |                   |          |             |                              |          |             |
|--------------------------|----------|-------------|-------------------|----------|-------------|------------------------------|----------|-------------|
| Healthy                  |          |             | Healthy + Sutures |          |             | Healthy + Sutures + Adhesive |          |             |
| Inflammation             | Fibrosis | Heterophils | Inflammation      | Fibrosis | Heterophils | Inflammation                 | Fibrosis | Heterophils |
| 0                        | 0        | 0           | 2                 | 2.5      | 3           | 2.5                          | 4        | 4           |
| 0                        | 0        | 0           | 2                 | 4        | 2.5         | 2.5                          | 4        | 4           |
| 0                        | 0        | 0           | 2                 | 1        | 0.5         | 1.5                          | 4        | 4           |
| 0                        | 0        | 0           | 2                 | 4        | 3           | 1                            | 2.5      | 2           |
| 0                        | 0        | 0           | 2                 | 4        | 3           | 1                            | 4        | 4           |

Supplemental Table 6. Tabulated data from Figure 4b.

| Cancer rat in vivo data |          |             |                  |          |             |                             |          |             |
|-------------------------|----------|-------------|------------------|----------|-------------|-----------------------------|----------|-------------|
| Cancer                  |          |             | Cancer + Sutures |          |             | Cancer + Sutures + Adhesive |          |             |
| Inflammation            | Fibrosis | Heterophils | Inflammation     | Fibrosis | Heterophils | Inflammation                | Fibrosis | Heterophils |
| 1                       | 0        | 0           | 0.5              | 2.5      | 4           | 2                           | 4        | 4           |
| 1                       | 0        | 0           | 2.5              | 2.5      | 4           | 1.5                         | 4        | 4           |
| 1                       | 0        | 0           | 2                | 2        | 4           | 1.5                         | 4        | 4           |
| 1                       | 0        | 0           | 1.5              | 4        | 4           | 1.5                         | 4        | 4           |
| 1                       | 0        | 0           | 1.5              | 2        | 3           | 1                           | 4        | 4           |

Supplemental Table 7. Tabulated data from Figure 4c.



| Healthy rabbit in vivo data |          |             |                   |          |             |                              |          |             |
|-----------------------------|----------|-------------|-------------------|----------|-------------|------------------------------|----------|-------------|
| Healthy                     |          |             | Healthy + Sutures |          |             | Healthy + Sutures + Adhesive |          |             |
| Inflammation                | Fibrosis | Heterophils | Inflammation      | Fibrosis | Heterophils | Inflammation                 | Fibrosis | Heterophils |
| 0                           | 0        | 0           | 2                 | 3        | 3           | 0.5                          | 1        | 1           |
| 0                           | 0        | 0           | 1                 | 3        | 3           | 0.5                          | 2.5      | 3           |
| 0                           | 0        | 0           | 1.5               | 2.5      | 4           | 0.5                          | 3        | 1.5         |
| 0                           | 0        | 0           | 1.5               | 4        | 3           | 0.5                          | 2        | 2           |
| 0                           | 0        | 0           | 1.5               | 3        | 2.5         | 1                            | 2.5      | 3           |

Supplemental Table 8. Tabulated data from Figure 4d.

| Colitis rabbit in vivo data |          |             |                   |          |             |                              |          |             |
|-----------------------------|----------|-------------|-------------------|----------|-------------|------------------------------|----------|-------------|
| Colitis                     |          |             | Colitis + Sutures |          |             | Colitis + Sutures + Adhesive |          |             |
| Inflammation                | Fibrosis | Heterophils | Inflammation      | Fibrosis | Heterophils | Inflammation                 | Fibrosis | Heterophils |
| 4                           | 0        | 0           | 4                 | 2        | 1.5         | 4                            | 3        | 4           |
| 4                           | 0        | 0           | 4                 | 1        | 2.5         | 4                            | 4        | 4           |
| 4                           | 0        | 0           | 4                 | 2        | 2.5         | 4                            | 2.5      | 4           |
| 3                           | 0        | 0           | 4                 | 2        | 1.5         | 4                            | 4        | 4           |
| 4                           | 0        | 0           | 4                 | 1.5      | 2           | 4                            | 2.5      | 4           |

Supplemental Table 9. Tabulated data from Figure 4e.
